# Supplementary material
Source: Research Square preprint supplement (doi:10.21203/rs.3.rs-9404575/v1)
Supplement: Supplementary file 1 [file 7f251a37f28b6d9714491245.docx]

**Additional file 1**

Supplementary Methods 1. Assessment of physical activity and anthropometric measurements

Physical activity

A description of physical activity ascertainment, validity and reproducibility has been previously described in detail 3-6. Briefly, physical activity data were obtained at baseline either in-person interviews (Germany, Greece, and Spain) or self-administered (Denmark, France, Italy, the Netherlands, and the UK) using a standardized questionnaire. In the centers in Malmö (Sweden) and Naples (Italy), the format of the physical activity questions was somewhat different with that in the other centers (categorical frequencies and durations rather than continuous); however, these data were transformed and combined with the data from the other centers. In Norway, participants were asked to rank their total physical activity level on a 10-item scale from 1 (lowest) to 10 (highest); the self-administered questionnaire was validated later showing adequate Spearman’s rank correlation coefficients 6.

Data on current occupational activity included employment status and the level of physical activity performed at work (unemployed, sedentary, standing, manual, heavy manual, and unknown). Manual and heavy manual work was combined since the last category included only about 2% of the subjects. In the Danish centers, the questionnaire focused on type of work activity performed within the last year, and participants who did not answer this question were categorized as non-workers. Housewives were categorized as non-workers, except in the Spanish cohort, where housewives were coded as having a standing occupation. To avoid incorrectly inflating the combined household and occupational activity, Spanish housewives were re-coded as non-workers if they did 35 hours/week or more of housework, rather than as standing workers. For non-occupational physical activity, the frequency and duration of household and recreational activities were captured, in summer and winter separately, during a typical week within the last year. Household activities included housework, home repair (do-it-yourself), gardening, and stair climbing; and recreational activities included walking, cycling, and sport activities. The intensity of household and recreational activities was not directly re-coded, and a metabolic equivalent (MET) value was assigned to each reported activity according to the Compendium of Physical Activities 7. A MET is defined as the ratio of work metabolic rate to a standard metabolic rate of 1.0 (4.184 kJ) kg-1 h-1. The assigned MET values were 3.0 for housework, 4.5 for home repair, 4.0 for gardening, 8.0 for stair climbing, 3.0 for walking, 6.0 for cycling, and 6.0 for sports, obtained by estimating the average of all comparable activities in the Compendium. The mean of hours per week was estimated and then multiplied by the appropriate MET values, obtaining a MET-hours/week per activity. Household and recreational activities in MET-hours/week were combined, and cohort participants were classified according to sex-specific EPIC-wide quartiles of total non-occupational physical activity (low, medium, high, and very high). In Umeå (Sweden), neither recreational nor household activities were recorded, whereas in Norway, data on recreational activities were not collected. In addition, the frequency and duration of vigorous non occupational activity, defined as activities that causes sweating or increased heart rate, were assessed in the whole cohort except for Naples (Italy), Sweden and Norway. The MET value assigned for vigorous activity was 9.0. No data on vigorous activity was collected in Naples (Italy), Sweden and Norway.

The combination of occupational, recreational, and household activities was derived from two indices of total physical activity (inactive, moderately inactive, moderately active, and active). The Cambridge Index of physical activity was derived by combining occupational activity with recreational activity, as assessed by the number of hours spent doing cycling and other sports 3,5. The second index, the total physical activity index, cross-tabulates all recreational and household activities combined with occupational activity 8,9. There is missing data for Umeå (Sweden).

Anthropometric measurements

At recruitment anthropometric measurements including body height, weight, hip circumferences, and waist circumference were measured according to standardized procedures4. In brief, weight and height were measured to the nearest 0.1 kg and 0.1 or 0.5 cm respectively, with subjects wearing no shoes, in participating centers. Waist circumference was measured either at the narrowest torso circumference (France, Italy, Utrecht (The Netherlands), and Denmark) or at the midpoint between the lower ribs and iliac crest (Bilthoven (The Netherlands), Potsdam (Germany), Malmo (Sweden), and Oxford (the UK)). In Spain, Greece, Heidelberg (Germany) and Cambridge (the UK), a combination of methods was used, although most participants were measured at the narrowest circumference. Hip circumference was measured at the widest circumference (France, Italy, Spain, Bilthoven (The Netherlands), and Malmö (Sweden)) or over the buttocks (the UK, Utrecht (The Netherlands), Germany, and Denmark). Waist and hip circumferences were not collected in Umeå (Sweden) and Norway.

For the present study, body weight, and waist and hip circumferences were corrected to reduce heterogeneity due to protocol differences in clothing worn during measurement. In Umeå (Sweden), only weight and height were collected. In Norway, only weight and height were collected, based on self-reports that had been previously validated 10. In France, self-reported weight and height were recorded in all participants and direct measurements were collected for a subgroup of the participants (29%). For the “health-conscious” group based in Oxford (the UK) where only self-reported data were available, linear regression models were used to adjust these values using sex- and age-specific values from subjects with both measured and self-reported body measures 4,11.

Body mass index (BMI) was calculated as weight in kilograms divided by height in meters squared (kg/m2). Subjects were classified as underweight (BMI < 18.5 kg/m2), healthy or normal weight (BMI between 18.5 and < 25.0 kg/m2), overweight (BMI between 25.0 and < 30.0 kg/m2), and obesity (BMI ≥30.0 kg/m2) 12,13. Body shape was also measured using “a body shape index” (ABSI), calculated as waist circumference (m) ∗ weight− 2/3 (kg) ∗ height5/6 (m) and multiplied by 1000 2. Waist-to-hip ratio (WHR) was calculated as waist circumference divided by hip circumference (cm/cm). Waist-to-height ratio (WHtR) was calculated as waist circumference divided by height (cm/cm). The variables that can be used to represent anthropometric characteristics are BMI for general obesity and ABSI and WHR for central obesity 1. WHtR is an alternative indicator of central obesity accounting for individual height in relation to waist circumference 14.

Supplementary Table 1 – Characteristics in the European Prospective Investigation into Cancer and Nutrition (EPIC) cohort study.

| **Country** | **Cohort size**  **(N)** | **Person-years** | **Age at recruitment**  **(Mean (SD))** | **Years of follow-up**  **(Mean (SD))** | **ICC cases**  **(N)** |
| --- | --- | --- | --- | --- | --- |
| Denmark | 24,979 | 376,246 | 56.7 (4.4) | 15.1 (3.9) | 58 |
| France | 61,951 | 798,369 | 52.4 (6.6) | 12.9 (3.4) | 35 |
| Germany | 23,788 | 247,210 | 48.1 (8.9) | 10.4 (3.0) | 27 |
| Italy | 28,335 | 404,619 | 50.3 (8.1) | 14.3 (3.0) | 26 |
| Norway | 33,082 | 440,283 | 48.0 (4.3) | 13.3 (2.5) | 52 |
| Spain | 23,230 | 373,131 | 47.9 (8.4) | 16.1 (2.9) | 40 |
| Sweden | 26,238 | 439,893 | 52.0 (10.8) | 16.8 (4.8) | 37 |
| The Netherlands | 22,711 | 324,925 | 49.8 (12.0) | 14.3 (3.3) | 34 |
| United Kingdom | 49,209 | 741,895 | 46.9 (14.5) | 15.1 (3.6) | 60 |
| Total | 293,523 | 4,146,574 | 50.2 (9.8) | 14.1 (3.8) | 369 |

Abbreviations: SD: standard deviation; ICC: invasive cervical cancer.

Supplementary Table 2. Odds ratios (ORs) and 95% confidence intervals (CIs) of invasive cervical cancer (ICC) according to anthropometric measures and physical activity levels in the nested case-control study.

| **Risk factor** | **ICC** | |
| --- | --- | --- |
| **Controls / Cases** | **OR (95% CI) 1** |
| ***Anthropometric variables*** | | |
| **BMI (kg/m2)** |  |  |
| <18.5 | 6 / 2 | 0.17 (0.01, 3.02) |
| 18.5 - < 25 | 184 / 95 | 1 |
| 25 - < 30 | 104 / 45 | 0.74 (0.43, 1.28) |
| ≥30 | 48 / 29 | 1.02 (0.49, 2.09) |
| Per 5 kg/m2 |  | 0.98 (0.75, 1.28) |
| **ABSI (m/kg2/3*m5/6) 2** |  |  |
| ABSI - Q1 | 59 / 26 | 1 |
| ABSI - Q2 | 63 / 23 | 0.76 (0.28, 2.06) |
| ABSI - Q3 | 55 / 30 | 1.47 (0.61, 3.56) |
| ABSI - Q4 | 48 / 37 | 1.49 (0.58, 3.86) |
| ABSI - Q5 | 59 / 26 | 0.85 (0.33, 2.24) |
| Per 1 SD |  | 0.97 (0.72, 1.30) |
| **Waist circumference (cm) 2** |  |  |
| ≤88 | 221 / 105 | 1 |
| >88 | 61 / 36 | 0.99 (0.51, 1.91) |
| Per 1 cm |  | 1.00 (0.97, 1.03) |
| **Waist-to-hip ratio 2** |  |  |
| <0.85 | 233 / 109 | 1 |
| ≥0.85 | 51 / 33 | 1.15 (0.58, 2.31) |
| ***Physical activity variables*** | | |
| **Combined total physical activity 3,4** |  |  |
| Inactive | 62 / 29 | 1 |
| All non-inactive | 218 / 113 | 1.49 (0.71, 3.12) |
| Moderately inactive | 93 /46 | 1.23 (0.55, 2.76) |
| Moderately active | 103 /56 | 2.17 (0.88, 5.32) |
| Active | 22 /11 | 1.70 (0.54, 5.39) |
| **Cambridge physical activity Index 5** |  |  |
| Inactive | 81 / 51 | 1 |
| All non-inactive | 253 / 118 | 0.69 (0.40, 1.20) |
| Moderately inactive | 115 / 57 | 0.74 (0.40, 1.35) |
| Moderately active | 74 / 38 | 0.73 (0.36, 1.49) |
| Active | 64 / 23 | **0.41 (0.18, 0.91)** |
| **Recreational activity (MET*hr/week) 2,6** |  |  |
| Inactive | 120 / 54 | 1 |
| All non-inactive | 160 / 88 | 1.36 (0.79, 2.34) |
| Moderately inactive | 62 / 39 | 1.58 (0.80, 3.10) |
| Moderately active | 55 / 29 | 1.30 (0.65, 2.60) |
| Active | 43 / 20 | 1.06 (0.46, 2.44) |

Abbreviations: OR: odds ratio; CI: Confidence Interval; ICC: invasive cervical cancer; BMI: body mass index; ABSI: a body shape index; Q1-Q5: quintile 1 – quintile 5; SD: standard deviation; MET*hr/week: metabolic equivalent value-hour per week.

1 Conditional regression models adjusted by HPV L1 serology, Chlamydia trachomatis serology, Human herpesvirus 2 serology, marital status, level education, smoking habits, number of full-term pregnancies, OC use and duration, BMI (for and physical activity variables), Cambridge physical activity index (for anthropometric variables). ABSI was added as an adjustment variable for the specific Conditional regression model of body mass index and vice versa. 2 Excludes Norway and Sweden (Umeå) because information was not collected for this variable. 3 Excludes Sweden (Umeå) because information was not collected for this variable. 4 Combined total physical activity includes occupational, household and recreational activities. 5 The Cambridge Index of physical activity combines occupational and recreational activities (cycling and sports), excluding walking. 6 The recreational activity, in MET-hours/week, includes walking, cycling and sports.

The number of cases does not add up the total number of cases because of missing values of the exposure variable.

Bold font signifies a statistically significant effect (p<0.05).

Supplementary Table 3. Hazard ratios (HRs) and 95% confidence intervals (CIs) of invasive cervical cancer (ICC) according to main anthropometric measures and physical activity levels in the European Prospective Investigation into Cancer and Nutrition (EPIC) cohort study, separately for squamous cell carcinoma and adenocarcinoma.

|  | **ICC** | | | |
| --- | --- | --- | --- | --- |
|  | **Squamous Cell Carcinoma** | | **Adenocarcinoma** | |
| **Risk factor** | **Non-cases /**  **Cases** | **HR (95% CI) 1** | **Non-cases /**  **Cases** | **HR (95% CI) 1** |
| ***Anthropometric variables*** | | | | |
| **BMI (kg/m2)** |  |  |  |  |
| <18.5 | 6,445 / 5 | 1.01 (0.41, 2.49) | 6,445 / 4 | 2.31 (0.81, 6.54) |
| 18.5 - < 25 | 171,700 / 144 | 1 | 171,700 / 44 | 1 |
| 25 - < 30 | 81,285 / 66 | 0.83 (0.61, 1.12) | 81,285 / 25 | 1.25 (0.74, 2.09) |
| ≥30 | 32,572 / 39 | 1.09 (0.74, 1.60) | 32,572 / 15 | 1.80 (0.94, 3.44) |
| Per 5 kg/m2 |  | 1.01 (0.87, 1.18) |  | 1.13 (0.88, 1.45) |
| **ABSI (m/kg2/3*m5/6)** |  |  |  |  |
| ABSI - Q1 | 40,641 / 34 | 1 | 40,641 / 13 | 1 |
| ABSI - Q2 | 40,758 / 27 | 0.73 (0.44, 1.23) | 40,758 / 17 | 1.43 (0.67, 3.05) |
| ABSI - Q3 | 40,750 / 39 | 1.05 (0.65, 1.71) | 40,750 / 12 | 0.93 (0.40, 2.14) |
| ABSI - Q4 | 40,788 / 43 | 1.11 (0.68, 1.80) | 40,788 / 13 | 1.02 (0.44, 2.36) |
| ABSI - Q5 | 40,813 / 43 | 0.92 (0.56, 1.54) | 40,813 / 9 | 0.64 (0.25, 1.64) |
| Per 1 SD |  | 0.99 (0.84, 1.16) |  | 0.79 (0.60, 1.04) |
| **Waist circumference (cm) 2** |  |  |  |  |
| ≤88 | 164,704 / 140 | 1 | 164,704 / 49 | 1 |
| >88 | 39,046 / 46 | 1.08 (0.75, 1.57) | 39,046 / 15 | 1.22 (0.64, 2.35) |
| Per 1 cm |  | 1.00 (0.99, 1.02) |  | 1.00 (0.98, 1.03) |
| **Waist-to-hip ratio 2** |  |  |  |  |
| <0.85 | 166,248 / 139 | 1 | 166,248 / 54 | 1 |
| ≥0.85 | 37,492 / 47 | 1.15 (0.81, 1.65) | 37,492 / 10 | 0.75 (0.36, 1.53) |
| ***Physical activity variables*** |  |  |  |  |
| **Combined total physical 3,4** |  |  |  |  |
| Inactive | 42,786 / 46 | 1 | 42,786 / 16 | 1 |
| All non-inactive | 231,766 / 192 | 0.73 (0.51, 1.04) | 231,766 / 68 | 0.77 (0.43, 1.39) |
| Moderately inactive | 100,827 / 78 | 0.78 (0.53, 1.14) | 100,82 7 /26 | 0.72 (0.37, 1.37) |
| Moderately active | 108,932 / 91 | 0.64 (0.43, 0.95) | 108,932 / 38 | 0.92 (0.48, 1.77) |
| Active | 22,007 / 23 | 0.85 (0.51, 1.44) | 22,007 / 4 | 0.49 (0.16, 1.51) |
| **Cambridge physical activity Index 5** |  |  |  |  |
| Inactive | 59,136 / 58 | 1 | 59,136 / 23 | 1 |
| All non-inactive | 227,069 / 192 | 0.92 (0.65, 1.29) | 227,069 / 64 | 0.65 (0.38, 1.10) |
| Moderately inactive | 99,350 / 85 | 0.98 (0.69, 1.41) | 99,350 / 30 | 0.70 (0.39, 1.23) |
| Moderately active | 81,982 / 64 | 0.83 (0.55, 1.26) | 81,982 / 22 | 0.62 (0.32, 1.19) |
| Active | 45,737 / 43 | 0.86 (0.55, 1.34) | 45,737 / 12 | 0.55 (0.25, 1.17) |
| **Recreational activity (MET*hr/week) 2,6** |  |  |  |  |
| Inactive | 96,975 / 72 | 1 | 96,975 / 27 | 1 |
| All non-inactive | 146,771 / 126 | 1.08 (0.79, 1.47) | 146,771 / 48 | 1.19 (0.72, 1.95) |
| Moderately inactive | 62,372 / 46 | 0.97 (0.66, 1.42) | 62,372 / 25 | 1.42 (0.81, 2.47) |
| Moderately active | 49,995 / 38 | 0.96 (0.64, 1.45) | 49,995 / 14 | 1.01 (0.52, 1.97) |
| Active | 34,404 / 42 | 1.50 (0.99, 2.28) | 34,404 / 9 | 0.93 (0.42, 2.07) |

Abbreviations: HR: hazard ratio; CI: Confidence Interval; ICC: invasive cervical cancer; BMI: body mass index; ABSI: a body shape index; Q1-Q5: quintile 1 – quintile 5; SD: standard deviation; MET*hr/week: metabolic equivalent value-hour per week.

1 Cox regressions models stratified by age and center, and adjusted by marital status, level education, smoking habits, number of full-term pregnancies, oral contraceptive use and duration, BMI (for physical activity variables), and physical activity (for anthropometric variables). ABSI was added as an adjustment variable for the specific Cox regression model of BMI and vice versa. 2 Excludes Norway and Sweden (Umeå) because information was not collected for this variable. 3 Excludes Sweden (Umeå) because information was not collected for this variable. 4 Combined total physical activity includes occupational, household and recreational activities. 5 The Cambridge Index of physical activity combines occupational and recreational activities (cycling and sports), excluding walking. 6 The recreational activity, in MET-hours/week, includes walking, cycling and sports.

The number of cases does not add up the total number of cases because of missing values of the exposure variable.

Bold font signifies a statistically significant effect (p<0.05).

**References additional files**

1. Diet, activity and cancer - WCRF International. Accessed January 10, 2024. https://www.wcrf.org/diet-activity-and-cancer/

2. Krakauer NY, Krakauer JC. A new body shape index predicts mortality hazard independently of body mass index. *PLoS One*. 2012;7(7). doi:10.1371/JOURNAL.PONE.0039504

3. Peters T, Brage S, Westgate K, et al. Validity of a short questionnaire to assess physical activity in 10 European countries. *Eur J Epidemiol*. 2012;27(1):15-25. doi:10.1007/S10654-011-9625-Y

4. Haftenberger M, Schuit A, Tormo M, et al. Physical activity of subjects aged 50-64 years involved in the European Prospective Investigation into Cancer and Nutrition (EPIC). *Public Health Nutr*. 2002;5(6B):1163-1177. doi:10.1079/PHN2002397

5. Wareham NJ, Jakes RW, Rennie KL, et al. Validity and repeatability of a simple index derived from the short physical activity questionnaire used in the European Prospective Investigation into Cancer and Nutrition (EPIC) study. *Public Health Nutr*. 2003;6(4):407-413. doi:10.1079/PHN2002439

6. Borch KB, Ekelund U, Brage S, Lund E. Criterion validity of a 10-category scale for ranking physical activity in Norwegian women. *Int J Behav Nutr Phys Act*. 2012;9. doi:10.1186/1479-5868-9-2

7. Ainsworth BE, Haskell WL, Whitt MC, et al. Compendium of physical activities: an update of activity codes and MET intensities. *Med Sci Sports Exerc*. 2000;32(9 Suppl). doi:10.1097/00005768-200009001-00009

8. Cust AE, Smith BJ, Chau J, et al. Validity and repeatability of the EPIC physical activity questionnaire: a validation study using accelerometers as an objective measure. *Int J Behav Nutr Phys Act*. 2008;5. doi:10.1186/1479-5868-5-33

9. Friedenreich C, Norat T, Steindorf K, et al. Physical activity and risk of colon and rectal cancers: the European prospective investigation into cancer and nutrition. *Cancer Epidemiol Biomarkers Prev*. 2006;15(12):2398-2407. doi:10.1158/1055-9965.EPI-06-0595

10. Skeie G, Mode N, Henningsen M, Borch KB. Validity of self-reported body mass index among middle-aged participants in the Norwegian Women and Cancer study. *Clin Epidemiol*. 2015;7:313-323. doi:10.2147/CLEP.S83839

11. Spencer EA, Appleby PN, Davey GK, Key TJ. Validity of self-reported height and weight in 4808 EPIC-Oxford participants. *Public Health Nutr*. 2002;5(4):561-565. doi:10.1079/PHN2001322

12. report WCWHO technical, 2000 undefined. Obesity: preventing and managing the global epidemic. *researchgate.netWHO ConsultationWorld Health Organization technical report series, 2000•researchgate.net*. Published online 2000. Accessed January 10, 2024. https://www.researchgate.net/profile/Yehya-Salih/post/Article-on-overweight-obesity-and-incident-asthma/attachment/5d84aaeb3843b0b982652459/AS%3A805156153204747%401568975594689/download/OBESITY-+PREVENTING+AND+MANAGING.pdf

13. A healthy lifestyle - WHO recommendations. Accessed January 10, 2024. https://www.who.int/europe/news-room/fact-sheets/item/a-healthy-lifestyle---who-recommendations

14. Ashwell M, Gunn P, Gibson S. Waist-to-height ratio is a better screening tool than waist circumference and BMI for adult cardiometabolic risk factors: systematic review and meta-analysis. *Obes Rev*. 2012;13(3):275-286. doi:10.1111/J.1467-789X.2011.00952.X
